# Supplementary material for: Assessing the Retail Food Environment in Madrid: An Evaluation of Administrative Data against Ground Truthing
Source: MDPI journal article supplement (doi:10.3390/ijerph16193538), 2019-09-21
Supplement: s2 [file s2]

## SUPPLEMENTARY MATERIAL

**Figure S1.** Example of allowable street names discrepancies. This figure shows an example of a food outlet listed in the administrative dataset as being located in 'San Narciso Street' (on the right), that was recorded during ground-truthing to be located on 'Esfinge Street' (on the left). We conducted this manual process of examining discrepancies using Google Street View. Image source: Google Street View

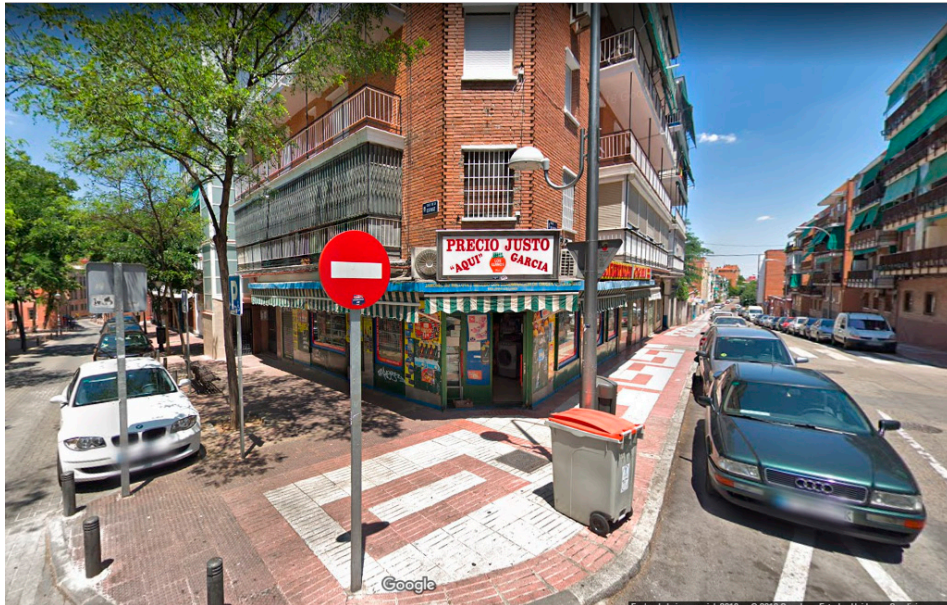

**Table S1.** Descriptive statistics of the 42 census tracts included in the street audits (Madrid, 2016)

| Census Tract  | Area-level SES <sup>1</sup> | Low Education (%) | % of population (age ≥65) | % of foreign-born | Population density (pop/km <sup>2</sup> ) | Retail density (retailers/km <sup>2</sup> ) | Land area (km <sup>2</sup> ) |
|---------------|-----------------------------|-------------------|---------------------------|-------------------|-------------------------------------------|---------------------------------------------|------------------------------|
| 1             | 0.49                        | 16.89             | 18.44                     | 30.77             | 32731.94                                  | 1238.94                                     | 0.03                         |
| 2             | 0.47                        | 13.40             | 16.27                     | 29.93             | 38541.94                                  | 1812.05                                     | 0.03                         |
| 3             | 0.68                        | 15.74             | 18.76                     | 13.82             | 44104.48                                  | 316.73                                      | 0.03                         |
| 4             | 0.42                        | 15.08             | 20.89                     | 20.57             | 39496.77                                  | 485.41                                      | 0.04                         |
| 5             | 0.73                        | 12.36             | 16.35                     | 12.75             | 42174.88                                  | 114.45                                      | 0.03                         |
| 6             | 13.92                       | 5.77              | 25.84                     | 10.63             | 48290.04                                  | 176.99                                      | 0.03                         |
| 7             | 12.82                       | 8.58              | 24.46                     | 17.85             | 40539.74                                  | 810.79                                      | 0.02                         |
| 8             | 18.40                       | 6.81              | 22.25                     | 22.11             | 20595.24                                  | 303.51                                      | 0.07                         |
| 9             | 14.56                       | 6.69              | 26.80                     | 13.40             | 13222.39                                  | 172.19                                      | 0.14                         |
| 10            | 17.48                       | 4.41              | 21.40                     | 14.72             | 9278.95                                   | 6.33                                        | 0.16                         |
| 11            | -0.18                       | 18.53             | 17.98                     | 37.89             | 45726.18                                  | 360.31                                      | 0.03                         |
| 12            | -0.22                       | 24.32             | 15.41                     | 26.73             | 32776.81                                  | 171.79                                      | 0.06                         |
| 13            | 10.21                       | 10.77             | 19.16                     | 22.07             | 37623.68                                  | 568.07                                      | 0.02                         |
| 14            | 10.79                       | 10.58             | 24.23                     | 21.63             | 36603.89                                  | 387.16                                      | 0.03                         |
| 15            | 0.26                        | 18.35             | 25.53                     | 12.76             | 30204.03                                  | 260.88                                      | 0.03                         |
| 16            | 16.56                       | 2.33              | 2.70                      | 7.62              | 7395.24                                   | 26.84                                       | 0.34                         |
| 17            | 11.65                       | 7.40              | 25.18                     | 15.33             | 35385.75                                  | 619.90                                      | 0.04                         |
| 18            | 14.36                       | 5.12              | 13.94                     | 13.35             | 4303.60                                   | 0.00                                        | 0.35                         |
| 19            | -0.74                       | 32.57             | 20.77                     | 23.78             | 22565.16                                  | 89.12                                       | 0.06                         |
| 20            | -0.65                       | 26.56             | 29.77                     | 21.28             | 37135.86                                  | 218.63                                      | 0.03                         |
| 21            | -11.15                      | 28.53             | 21.94                     | 29.26             | 40390.71                                  | 254.67                                      | 0.02                         |
| 22            | -0.91                       | 27.12             | 22.24                     | 27.94             | 26344.27                                  | 168.10                                      | 0.08                         |
| 23            | -0.79                       | 21.83             | 21.29                     | 25.80             | 35399.16                                  | 379.78                                      | 0.05                         |
| 24            | -12.21                      | 32.43             | 16.35                     | 48.82             | 42808.95                                  | 535.90                                      | 0.03                         |
| 25            | -13.33                      | 30.82             | 15.10                     | 34.76             | 42179.87                                  | 384.55                                      | 0.04                         |
| 26            | -13.16                      | 30.74             | 19.28                     | 30.58             | 44701.12                                  | 246.29                                      | 0.02                         |
| 27            | -0.37                       | 31.93             | 26.05                     | 10.34             | 26772.57                                  | 41.64                                       | 0.05                         |
| 28            | -0.26                       | 28.05             | 33.12                     | 15.70             | 35352.14                                  | 166.49                                      | 0.02                         |
| 29            | 0.30                        | 15.24             | 23.31                     | 20.72             | 27504.61                                  | 349.51                                      | 0.07                         |
| 30            | 0.40                        | 18.36             | 26.92                     | 14.62             | 29021.18                                  | 336.25                                      | 0.04                         |
| 31            | -0.09                       | 24.03             | 26.09                     | 14.60             | 21512.82                                  | 137.40                                      | 0.05                         |
| 32            | -0.19                       | 23.41             | 17.55                     | 13.34             | 16447.13                                  | 22.32                                       | 0.13                         |
| 33            | -22.33                      | 40.66             | 16.47                     | 46.34             | 38594.41                                  | 101.51                                      | 0.05                         |
| 34            | -10.68                      | 31.93             | 15.33                     | 34.97             | 34244.11                                  | 206.91                                      | 0.04                         |
| 35            | -0.81                       | 31.68             | 19.64                     | 19.05             | 44769.25                                  | 227.45                                      | 0.03                         |
| 36            | -0.31                       | 15.09             | 19.46                     | 20.73             | 27657.39                                  | 93.60                                       | 0.04                         |
| 37            | -0.56                       | 38.56             | 24.88                     | 28.27             | 24789.71                                  | 666.08                                      | 0.03                         |
| 38            | -13.33                      | 38.56             | 27.48                     | 25.33             | 19634.09                                  | 180.50                                      | 0.05                         |
| 39            | -0.98                       | 42.71             | 25.10                     | 15.59             | 40346.41                                  | 0.00                                        | 0.02                         |
| 40            | -0.53                       | 26.91             | 23.55                     | 20.80             | 34207.49                                  | 369.27                                      | 0.06                         |
| 41            | -0.40                       | 24.04             | 16.44                     | 24.23             | 16943.91                                  | 250.18                                      | 0.09                         |
| 42            | 15.53                       | 10.52             | 10.55                     | 12.60             | 5330.93                                   | 0.00                                        | 0.28                         |
| <b>Mean</b>   | 1.33                        | 20.84             | 20.82                     | 21.99             | 30801.16                                  | 315.68                                      | 0.07                         |
| <b>(SD)</b>   | (9.42)                      | (11.05)           | (5.54)                    | (9.42)            | (11825.84)                                | (339.99)                                    | (0.08)                       |
| <b>Median</b> | -0.19                       | 20.18             | 21.09                     | 20.77             | 34225.80                                  | 236.87                                      | 0.04                         |
| <b>(IQR)</b>  | (-0.78, 10.20)              | (10.77, 30.74)    | (16.46, 25.10)            | (14.59, 27.93)    | (22565.16, 40346.41)                      | (114.45, 379.77)                            | (0.03, 0.05)                 |
| <b>Min</b>    | -22.33                      | 2.33              | 2.70                      | 7.62              | 4303.60                                   | 0.00                                        | 0.02                         |
| <b>Max</b>    | 18.40                       | 42.71             | 33.12                     | 48.82             | 48290.04                                  | 1812.05                                     | 0.35                         |

<sup>1</sup> Area-level socioeconomic status was measured using a composite index, developed by Gullon et al [45], which is made up of seven indicators (low education, high education, part-time work, temporary work, manual work, unemployment, and average housing prices).

**Table S2.** Statistical Classification of Economic Activities in the European Community (NACE) codes and definitions and corresponding codes and definitions in the National Classification of Economic Activities (CNAE) in Spain

| NACE <sup>1</sup> code | NACE definition                                                                                                                              | CNAE <sup>2</sup> code and definition                                                                                                                                                                         |
|------------------------|----------------------------------------------------------------------------------------------------------------------------------------------|---------------------------------------------------------------------------------------------------------------------------------------------------------------------------------------------------------------|
| 47.1                   | Retail sale in non-specialized stores                                                                                                        |                                                                                                                                                                                                               |
| 47.11                  | Retail sale in non-specialized stores <sup>3</sup> with food, beverages or tobacco predominating.                                            | 47.11.01 – ‘autoservicio’<br>47.11.02 – ‘grandes superficies’<br>47.11.03 – ‘tienda de conveniencia. 24h’                                                                                                     |
| 47.2                   | Retail sale in specialized stores                                                                                                            |                                                                                                                                                                                                               |
| 47.21                  | Retail sale of fruits and vegetables in specialized stores, including the retail sale of fresh, prepared and preserved fruits and vegetables | 47.21.01; 47.21.02 – ‘comercio de frutas y hortalizas’                                                                                                                                                        |
| 47.22                  | Retail sale of meat and meat products (including poultry)                                                                                    | 47.22.01 – ‘carnicería’<br>47.22.02 – ‘charcutería’<br>47.22.03 – ‘carnicería-charcutería’<br>47.22.04 – ‘carnicería-salchichería’<br>47.22.05 and 47.22.06 – ‘aves, huevos y caza’<br>47.22.07 – ‘casquería’ |
| 47.23                  | Retail sale of fish, crustaceans and molluscs                                                                                                | 47.23.01 and 47.23.02 – ‘pescado y mariscos’<br>47.23.03 – ‘bacalao’                                                                                                                                          |
| 47.24                  | Retail sale of bread, cakes, flour confectionery and sugar confectionery                                                                     | 47.24.01 and 47.24.02 – ‘pan, productos de panadería y bollería’<br>47.24.03 - 47.24.05 ‘pastelería, confitería, Repostería’                                                                                  |
| 47.29                  | Other retail sale of food in specialized stores not else classified                                                                          | 47.29.01 – ‘herbolario’<br>47.29.02 – 47.29.04 ‘heladería’<br>47.29.05 – ‘congelados’<br>47.29.06 – ‘golosinas’<br>47.29.07 – ‘frutos secos’                                                                  |

<sup>1</sup> NACE is the acronym for “Nomenclature statistique des activités économiques dans la Communauté européenne”

<sup>2</sup> CNAE is the acronym for “Clasificación Nacional de Actividades Económicas”

<sup>3</sup> NACE classification does not differentiate between unspecialized retailers and includes the entire range of large chain, small independent and discount supermarkets together with convenience stores

**Table S3.** List of un-matched food outlets (N=24) due to discrepancies in food outlet names

| Food outlet name recorded during ground-truthing | Food outlet name registered on the administrative dataset |
|--------------------------------------------------|-----------------------------------------------------------|
| Panaderia                                        | Prensa y alimentaci0n vicente                             |
| Alimentacion R. Garcia                           | Garcia rubio jose ramon                                   |
| Bazar                                            | Alimentacion xiaoli shan                                  |
| Spass dia 365                                    | Alimentacion                                              |
| Tahona castellana                                | Croisanteria alonso (antes felipe godoy)                  |
| Arganium                                         | Rotulo no informado                                       |
| Frutas y verduras emi                            | Violeta                                                   |
| Bocata del barrio                                | Sin indicar                                               |
| Frutas y verduras                                | Alimentacion                                              |
| Comercial madrid                                 | Alimentacion                                              |
| Claudia                                          | Fruteria mohamed                                          |
| Superconver                                      | Hiper dis'frutas                                          |
| Super euro                                       | Alimentacion suyan                                        |
| Fruteria la plaza                                | Rotulo no informado                                       |
| Alimentacion y bazar                             | Sin determinar                                            |
| Alimentacion zhou                                | (en chino)                                                |
| Herbolario soleil                                | Centro de estetica                                        |
| Alimentos asiaticos                              | Sin rotulo                                                |
| Sin nombre                                       | Frutas y verduras youssef                                 |
| Carniceria fruteria amina                        | Alimentacion khalid morabet                               |
| Frutas verduras yanira                           | R0tulo no informado                                       |
| Fruteria                                         | Snapo                                                     |
| Natur fruta                                      | Tienda de alimentacion                                    |
| Alimentacion grupo t                             | Sr                                                        |

**Table S4.** Contingency table of food outlets, by outlet type as measured by ground-truthing and using the administrative dataset and using a liberal matching strategy (N=101)

| Ground-truthing | Administrative dataset |               |             |            |            |             |          |          |
|-----------------|------------------------|---------------|-------------|------------|------------|-------------|----------|----------|
|                 | supermarkets           | small grocers | convenience | F&V stores | butcheries | fishmongers | bakeries | other    |
| supermarkets    | <b>13</b>              | 5             | 0           | 1          | 0          | 0           | 0        | 0        |
| small grocers   | 0                      | <b>31</b>     | 0           | 2          | 0          | 0           | 0        | 4        |
| convenience     | 0                      | 1             | <b>1</b>    | 0          | 0          | 0           | 0        | 1        |
| F&V stores      | 0                      | 4             | 0           | <b>7</b>   | 0          | 0           | 0        | 4        |
| butcheries      | 0                      | 2             | 0           | 0          | <b>5</b>   | 0           | 0        | 0        |
| fishmongers     | 0                      | 0             | 0           | 0          | 0          | <b>2</b>    | 0        | 0        |
| bakeries        | 0                      | 3             | 0           | 1          | 0          | 0           | <b>7</b> | 0        |
| other           | 0                      | 1             | 0           | 0          | 0          | 0           | 0        | <b>6</b> |

**Table S5.** Contingency table of food outlets, by outlet type as measured by ground-truthing and using the administrative dataset and using a strict matching strategy (N=58)

| Ground-truthing | Administrative dataset |               |             |            |            |             |          |          |
|-----------------|------------------------|---------------|-------------|------------|------------|-------------|----------|----------|
|                 | supermarkets           | small grocers | convenience | F&V stores | butcheries | fishmongers | bakeries | other    |
| supermarkets    | <b>11</b>              | 3             | 0           | 0          | 0          | 0           | 0        | 0        |
| small grocers   | 0                      | <b>16</b>     | 0           | 1          | 0          | 0           | 0        | 2        |
| convenience     | 0                      | 0             | <b>1</b>    | 0          | 0          | 0           | 0        | 0        |
| F&V stores      | 0                      | 2             | 0           | <b>4</b>   | 0          | 0           | 0        | 0        |
| butcheries      | 0                      | 2             | 0           | 0          | <b>2</b>   | 0           | 0        | 0        |
| fishmongers     | 0                      | 0             | 0           | 0          | 0          | <b>2</b>    | 0        | 0        |
| bakeries        | 0                      | 1             | 0           | 1          | 0          | 0           | <b>6</b> | 0        |
| other           | 0                      | 1             | 0           | 0          | 0          | 0           | 0        | <b>3</b> |

**Table S6.** Results of the log-binomial regression from where the results of Table 3 are derived.

|                                                                           | <b>Liberal matching</b><br>(N=101) |                    | <b>Strict matching</b><br>(N=58) |                    |
|---------------------------------------------------------------------------|------------------------------------|--------------------|----------------------------------|--------------------|
|                                                                           | <b>Sens</b>                        | <b>PPV</b>         | <b>Sens</b>                      | <b>PPV</b>         |
|                                                                           | <b>PR (95% CI)</b>                 | <b>PR (95% CI)</b> | <b>PR (95% CI)</b>               | <b>PR (95% CI)</b> |
| <b>Socioeconomic status</b>                                               |                                    |                    |                                  |                    |
| Low                                                                       | 1 (Ref.)                           | 1 (Ref.)           | 1 (Ref.)                         | 1 (Ref.)           |
| Middle                                                                    | 1.04 [0.94, 1.14]                  | 0.72 [0.57, 0.91]  | 1.30 [0.74, 2.27]                | 1.30 [0.74, 2.27]  |
| High                                                                      | 1.04 [0.95, 1.14]                  | 0.84 [0.73, 0.95]  | 1.61 [1.02, 2.54]                | 1.61 [1.02, 2.54]  |
| <b>Population density</b><br>(10 <sup>3</sup> residents/km <sup>2</sup> ) |                                    |                    |                                  |                    |
| Low                                                                       | 1 (Ref.)                           | 1 (Ref.)           | 1 (Ref.)                         | 1 (Ref.)           |
| Middle                                                                    | 0.94 [0.85, 1.03]                  | 0.99 [0.78, 1.25]  | 0.55 [0.37, 0.80]                | 0.55 [0.37, 0.80]  |
| High                                                                      | 0.99 [0.94, 1.07]                  | 0.99 [0.81, 1.20]  | 0.84 [0.57, 1.25]                | 0.84 [0.57, 1.25]  |
